# Supplementary material for: Ammonia synthesis using Fe/BZY–RuO2 catalysts and a caesium dihydrogen phosphate-based electrolyte at intermediate temperatures
Source: Royal Society of Chemistry journal article supplement (doi:10.1039/d0ma00905a), 2021-01-01
Supplement: d0ma00905a1.pdf [file d0ma00905a1.pdf]

**Table S 1 Catalytic NH<sub>3</sub> production rate over a Fe/BZY catalyst at 500 °C.**

| CYCLE                                              | 1   | 2   | 3   | 4   | 5   | 6   |
|----------------------------------------------------|-----|-----|-----|-----|-----|-----|
| Reaction rate<br>[10 <sup>-8</sup> mol/(s·g-cat.)] | 6.5 | 2.3 | 4.1 | 2.8 | 5.7 | 4.6 |

The catalytic activity of a Fe/BZY catalyst for NH<sub>3</sub> formation was evaluated at 500 °C and atmospheric pressure under a feed of N<sub>2</sub> at 10 ml/min and H<sub>2</sub> at 30 ml/min. The Fe/BZY catalyst of 0.19 g was used and the outlet gas was trapped by distilled water in a water trap for 3 min with an interval of 30 min. The amount of ammonia in the distilled water trap was quantified by the salicylate method.

**Table S 2 Blank experiment results for NH<sub>3</sub> contamination from the atmosphere and catalytic NH<sub>3</sub> formation from gases leaking between the anode and cathode.**

|        |                                             | Collected on cathode side<br>[mol/(s·cm <sup>2</sup> )] |                               | Collected on anode side<br>[mol/(s·cm <sup>2</sup> )] |                               |
|--------|---------------------------------------------|---------------------------------------------------------|-------------------------------|-------------------------------------------------------|-------------------------------|
|        |                                             | NH <sub>3</sub>                                         | N <sub>2</sub> H <sub>4</sub> | NH <sub>3</sub>                                       | N <sub>2</sub> H <sub>4</sub> |
| Blank  | Anode: Ar (20% H <sub>2</sub> O)            | BLD                                                     | BLD                           | BLD                                                   | BLD                           |
| exp. 1 | Cathode: dry N <sub>2</sub>                 | BLD                                                     | BLD                           | BLD                                                   | BLD                           |
| Blank  | Anode: Ar (20% H <sub>2</sub> O)            | BLD                                                     | BLD                           | BLD                                                   | BLD                           |
| exp. 2 | Cathode: dry Ar                             | BLD                                                     | BLD                           | BLD                                                   | BLD                           |
| Blank  | Anode: H <sub>2</sub> (3% H <sub>2</sub> O) | BLD                                                     | BLD                           | BLD                                                   | BLD                           |
| exp. 3 | Cathode: dry N <sub>2</sub>                 | BLD                                                     | BLD                           | BLD                                                   | BLD                           |

The amounts of NH<sub>3</sub> produced in the blank experiments were all below detection limit.

The detection limit for NH<sub>3</sub> is 0.01 mg/L, which corresponds to NH<sub>3</sub> production rate of

$2.5 \times 10^{-11} \text{ mol}/(\text{s cm}^2)$ , and that for  $\text{N}_2\text{H}_4$  is  $4 \text{ }\mu\text{g/L}$  and the corresponding formation rate is  $4.4 \times 10^{-12} \text{ mol}/(\text{s cm}^2)$ .

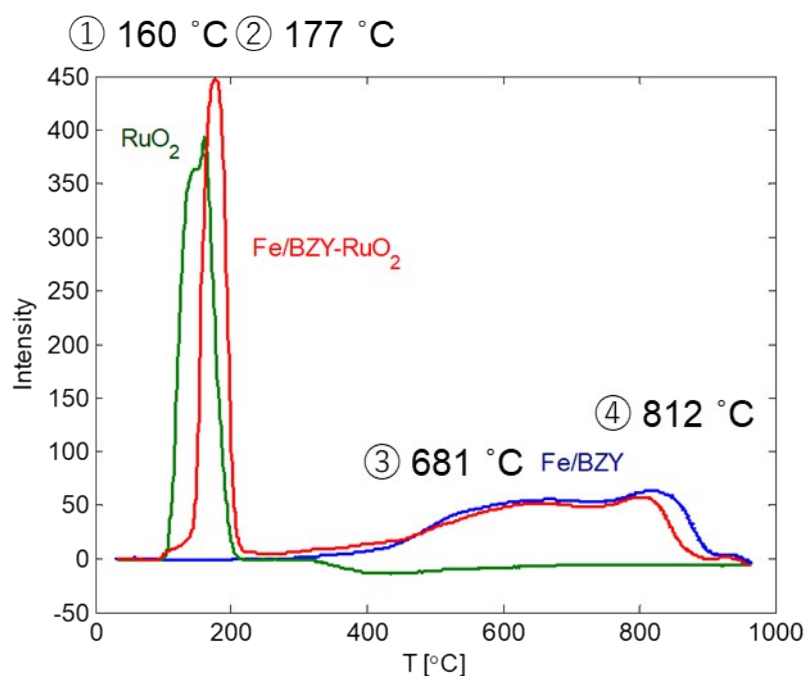

**Fig. S 1 TPR profiles of 5 mg RuO<sub>2</sub> (green), 30 mg Fe/BZY (blue), 5 mg RuO<sub>2</sub> and 30 mg Fe/BZY mixture (red). The samples were pretreated at 220 °C for 30 min using a heating rate of 10 K/min in Ar with a flow rate of 50 ml/min and cooled to room temperature. After flushing in diluted H<sub>2</sub> (5% H<sub>2</sub> in Ar) with a flow rate of 50 ml/min for 1 h, the samples were heated to 1000 °C at a heating rate of 10 K/min**

**Table S 3 Impedance fitting result under dry N<sub>2</sub>.**

| Applied voltage [V] | R <sub>s</sub> [Ω] | L1 [10 <sup>-7</sup> H] | R1 [Ω] | CPE1-T [10 <sup>-3</sup> F · s <sup>CPE1-P</sup> × 10 <sup>-1</sup> '] | CPE1-P × 10 <sup>-1</sup> | R2 [Ω] | CPE2-T [10 <sup>-3</sup> F · s <sup>CPE2-P</sup> × 10 <sup>-1</sup> '] | CPE2-P × 10 <sup>-1</sup> | f1 [Hz] | f2 [Hz] |
|---------------------|--------------------|-------------------------|--------|------------------------------------------------------------------------|---------------------------|--------|------------------------------------------------------------------------|---------------------------|---------|---------|
| 0                   | 7.33               | 4.34                    | 12.78  | 2.59                                                                   | 9.02                      | 56.08  | 7.16                                                                   | 3.69                      | 6.98    | 1.89    |
| -0.1                | 7.09               | 4.42                    | 24.57  | 4.98                                                                   | 7.94                      | 55.74  | 1.44                                                                   | 3.03                      | 2.24    | 0.33    |
| -0.2                | 7.23               | 4.32                    | 8.03   | 9.20                                                                   | 3.42                      | 56.04  | 8.02                                                                   | 6.58                      | 319.59  | 0.54    |
| -0.3                | 7.03               | 4.44                    | 8.57   | 1.41                                                                   | 3.02                      | 53.73  | 1.07                                                                   | 6.57                      | 173.53  | 0.37    |
| -0.4                | 7.36               | 4.19                    | 6.78   | 5.30                                                                   | 4.06                      | 52.69  | 9.36                                                                   | 6.16                      | 570.60  | 0.50    |
| -0.5                | 7.42               | 4.19                    | 9.73   | 6.32                                                                   | 3.92                      | 49.41  | 8.07                                                                   | 6.30                      | 195.09  | 0.68    |
| -0.6                | 7.56               | 4.17                    | 9.85   | 4.41                                                                   | 4.34                      | 50.54  | 4.9                                                                    | 6.60                      | 220.66  | 1.30    |
| -0.7                | 7.62               | 4.14                    | 7.96   | 3.11                                                                   | 4.68                      | 56.25  | 3.37                                                                   | 6.62                      | 427.71  | 1.96    |
| -0.8                | 7.73               | 4.08                    | 8.18   | 3.30                                                                   | 4.55                      | 58.18  | 2.55                                                                   | 6.83                      | 448.44  | 2.6     |
| -0.9                | 7.74               | 4.10                    | 8.42   | 3.01                                                                   | 4.55                      | 61.31  | 1.94                                                                   | 6.97                      | 511.14  | 3.37    |

Where

$$\begin{cases} \omega_{max1} = 2\pi f_1 = \frac{1}{C_1 R_1} \\ \omega_{max2} = 2\pi f_2 = \frac{1}{C_2 R_2} \end{cases} \quad \# \quad \text{Eq.-S 1}$$

$$C = T^{1/P} R^{\frac{1-P}{P}} \quad \# \text{Eq.-S 2}$$

$$\begin{cases} f_1 = \frac{1}{(T_1 R_1)^{1/P} 2\pi} \\ f_2 = \frac{1}{(T_2 R_2)^{1/P} 2\pi} \end{cases} \quad \# \quad \text{Eq.-S 3}$$

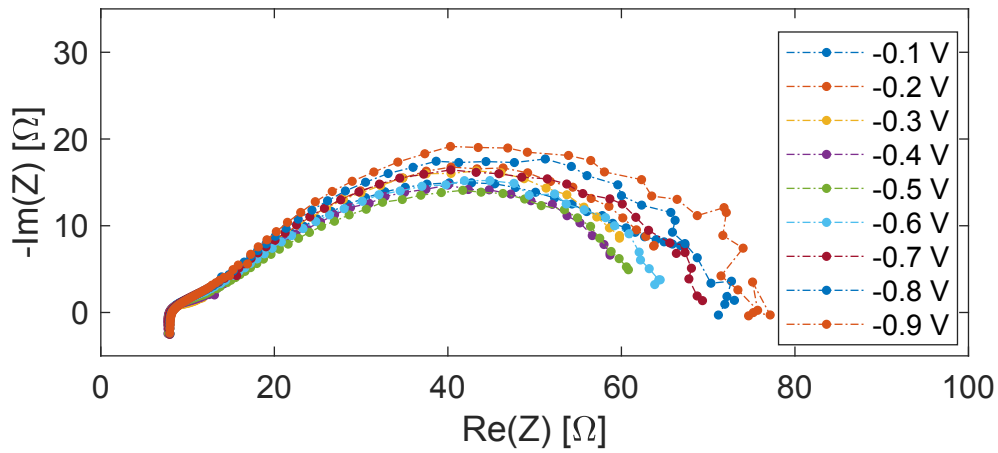

**Fig. S 2 Nyquist plots at different bias voltages.**

According to Eqns. 21 and 22

$$i(t) = \frac{\pi F D}{X^2} \sum_n (2n+1) \frac{(-1)^n \sqrt{k/D} (A e^{\sqrt{k/D} X} - B e^{-\sqrt{k/D} X}) + \left(n + \frac{1}{2}\right) \pi / X (A + B)}{\left(k/D + \left(\left(n + \frac{1}{2}\right) \pi / X\right)^2\right) e^{((n+1/2)\pi/X)^2 D + k} t}$$

$$i(t) = \frac{\pi F D}{X^2} \sum_n (2n+1) \frac{(-1)^n \sqrt{k/D} (A e^{\sqrt{k/D} X} - B e^{-\sqrt{k/D} X}) + \left(n + \frac{1}{2}\right) \pi / X (A + B)}{\left(k/D + \left(\left(n + \frac{1}{2}\right) \pi / X\right)^2\right) e^{((n+1/2)\pi/X)^2 D + k} t} + A_c e^{-\frac{1}{RC} t}$$

$i(t)$  is the sum of several exponential formulas, which are derived from the diffusion of H atoms in the metal bulk, decomposition of adsorbed species on the catalyst surface, and the discharge of the capacitor by electrical double layer. Since the term for the diffusion of H atoms is the infinite sum of exponential formulas, in order to solve the numerical solutions, the term of the H atom diffusion is approximated by the sum of  $n = 0$  and  $n = 1$ . Because the terms for H atom diffusion and the capacitor discharge decay very quickly,  $i(t)$  mainly consists of the term for the decomposition of the intermediates when

$t$  is sufficiently large. In this work, the raw data were fitted with  $F A_H e^{-k_1 t}$  or  $F \left( k_1 B_H e^{-k_1 t} + \frac{k_1 k_2}{k_1 + k_2} B_H e^{-k_2 t} \right)$  from 50 s to 100 s as shown in Figs. S 3 and S 4. The sum of the terms for the H atom diffusion and the capacitor discharge was fitted well with the residual.

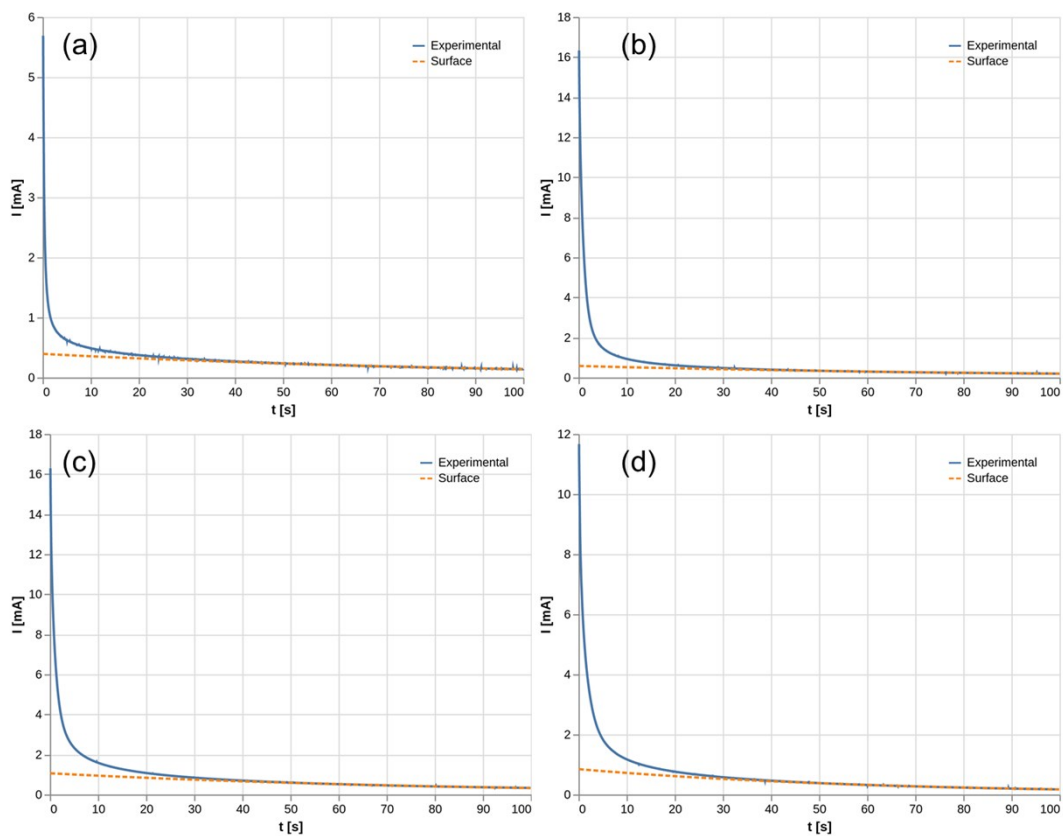

**Fig. S 3 Fitting results of the decomposition part under dry Ar gas atmosphere at cathode side. (a)  $-0.2$  V (b)  $-0.5$  V (c)  $-1.5$  V (d)  $-1.9$  V.**

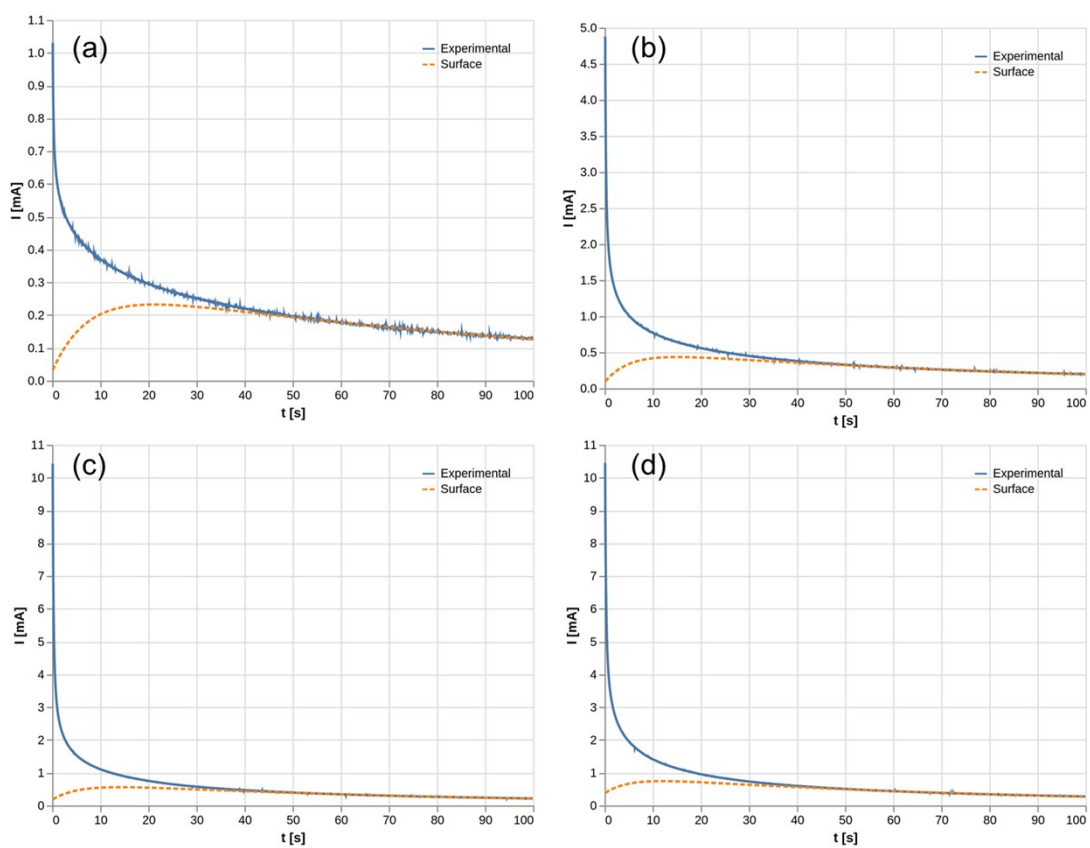

**Fig. S 4 Fitting results of the decomposition part under dry  $N_2$  gas atmosphere at cathode side. (a) -0.2 V (b) -0.5 V (c) -1.5 V (d) -1.9 V.**

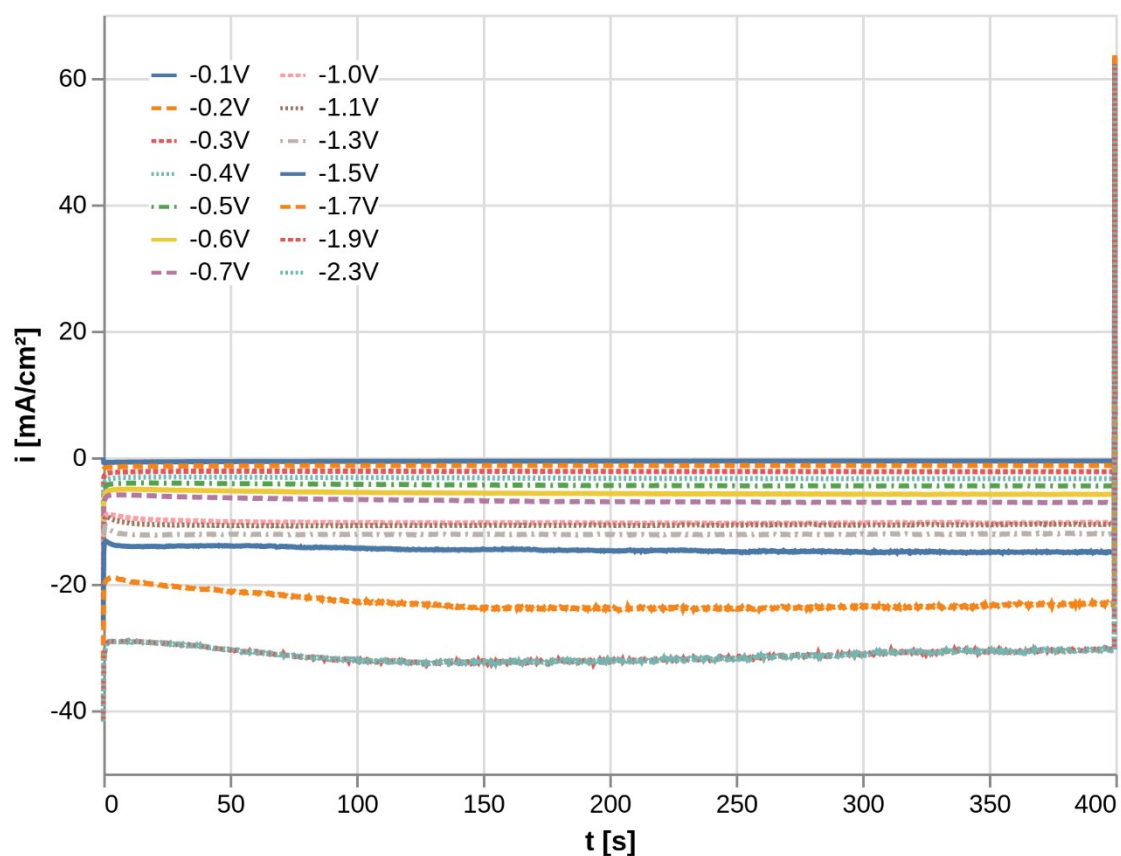

**Fig. S 5** Current density at different applied voltages. Cathode was supplied with dry  $N_2$ .

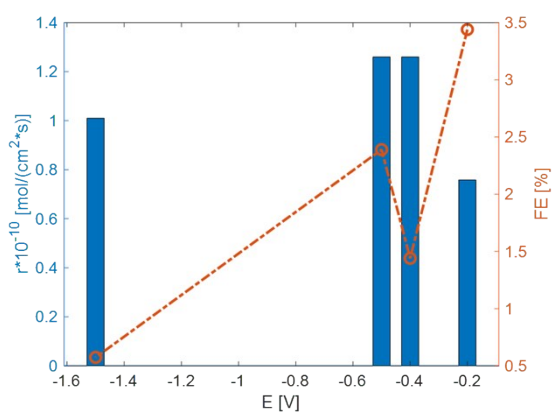

**Fig. S 6** Electrolysis results of a cell with  $RuO_2$  cathode catalyst (0.075 g) under dry  $N_2$  cathode and 3% humidified  $H_2$  anode atmosphere: Production rate and corresponding Faradic efficiency (FE) of  $NH_3$

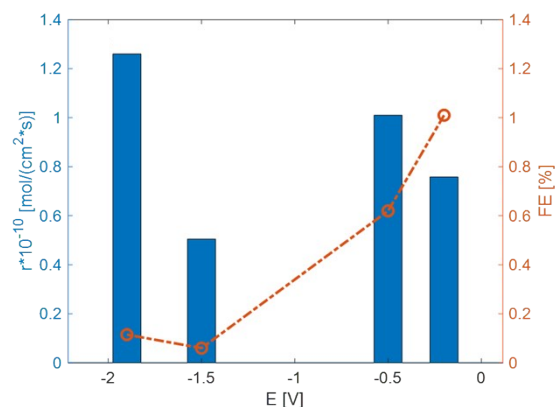

**Fig. S 7** Electrolysis results of a cell with 0.075 g Fe/BZY cathode catalyst under dry N<sub>2</sub> cathode and 3% humidified H<sub>2</sub> anode atmosphere: Production rate and corresponding Faradic efficiency (FE) of NH<sub>3</sub>.

**Table S 4** Fitting results with RuO<sub>2</sub> cathode catalyst under dry Ar gas atmosphere at cathode side.

| E [V] | $k_1$ [ $10^{-2} \text{ s}^{-1}$ ] | $\beta_H$ [ $10^{-7} \text{ mol}$ ] | $1/(RC)$ [ $\text{s}^{-1}$ ] |
|-------|------------------------------------|-------------------------------------|------------------------------|
| -0.5  | 1.3                                | 2.7                                 | 2.1                          |
| -1.5  | 1.3                                | 3.5                                 | 4.7                          |
| -1.9  | 1.6                                | 4.8                                 | 5.2                          |

**Table S 5** Fitting results with RuO<sub>2</sub> cathode catalyst under dry N<sub>2</sub> gas atmosphere at cathode side.

| E [V] | $k_1$ [ $10^{-2} \text{ s}^{-1}$ ] | $k_2$ [ $10^{-2} \text{ s}^{-1}$ ] | $\beta_H$ [ $10^{-8} \text{ mol}$ ] | $\beta_{NH \text{ or } N_2H}$ [ $10^{-8} \text{ mol}$ ] | $1/(RC)$ [ $\text{s}^{-1}$ ] |
|-------|------------------------------------|------------------------------------|-------------------------------------|---------------------------------------------------------|------------------------------|
| -0.5  | 2.9                                | 3.3                                | 1.9                                 | 2.8                                                     | 10.7                         |
| -1.5  | 2.9                                | 3.3                                | 7.1                                 | 2.6                                                     | 9.7                          |
| -1.9  | 1.6                                | 2.4                                | 20                                  | 9.4                                                     | 3.1                          |



**Table S 6 Fitting results with Fe/BZY cathode catalyst under dry Ar gas atmosphere at cathode side.**

| E [V] | $k_1$ [ $10^{-2} \text{ s}^{-1}$ ] | $\beta_H$ [ $10^{-7} \text{ mol}$ ] | $1/(RC)$ [ $\text{s}^{-1}$ ] |
|-------|------------------------------------|-------------------------------------|------------------------------|
| -0.5  | 1.1                                | 1.7                                 | 3.3                          |
| -1.5  | 1.0                                | 2.7                                 | 4.1                          |
| -1.9  | 1.1                                | 2.5                                 | 4.5                          |

**Table S 7 Fitting results with Fe/BZY cathode catalyst under dry N<sub>2</sub> gas atmosphere at cathode side.**

| E [V] | $k_1$ [ $10^{-2} \text{ s}^{-1}$ ] | $k_2$ [ $10^{-2} \text{ s}^{-1}$ ] | $\beta_H$ [ $10^{-8} \text{ mol}$ ] | $\beta_{NH \text{ or } N_2H}$<br>[ $10^{-8} \text{ mol}$ ] | $1/(RC)$ [ $\text{s}^{-1}$ ] |
|-------|------------------------------------|------------------------------------|-------------------------------------|------------------------------------------------------------|------------------------------|
| -0.5  | 1.7                                | 1.9                                | 9.7                                 | 3.2                                                        | 3.6                          |
| -1.5  | 1.3                                | 1.8                                | 20                                  | 10                                                         | 4.4                          |
| -1.9  | 1.4                                | 1.8                                | 17                                  | 6.8                                                        | 4.6                          |
